# Supplementary material for: Wenxin Keli for the Treatment of Arrhythmia—Systems Pharmacology and In Vivo Pharmacological Assessment
Source: Front Pharmacol. 2021 Aug 26;12:704622. doi: 10.3389/fphar.2021.704622 (PMC8426352; doi:10.3389/fphar.2021.704622)
Supplement: Supplementary file 1 [file Table2.XLSX]

## Sheet: Sheet1
Appendix 2. Target information of arrhythmia.(gene name)
No.	Target	No.	Target	No.	Target	No.	Target	No.	Target	No.	Target	No.	Target	No.	Target	No.	Target	No.	Target	No.	Target
1	CACNA1C	7	SCN2B	13	KCND3	19	KCNE1	25	KCNJ4	31	PITX2	37	PLN	42	CRYAB	47	AKAP7	52	KCNIP2	57	FXYD1
2	CACNA2D1	8	SCN3B	14	KCNE2	20	KCNE1L	26	KCNJ3	32	CAV3	38	TTR	43	FHL1	48	AKAP9	53	NPPA	58	RYR2
3	CACNA1D	9	SCN4B	15	KCNH2	21	KCNJ8	27	KCNJ5	33	FKBP1A	39	GPD1L	44	SNTA1	49	ANK1	54	NPPB2	59	APBA3
4	CACNA2D2	10	SCN5A	16	KCNE3	22	KCNJ11	28	HCN4	34	FKBP1B	40	HSPA1A	45	APLP2	50	ANK2	55	GJA1	60	SLC30A1
5	CACNB2	11	KCNA5	17	KCNE4	23	KCNJ12	29	FHL2	35	ASPH	41	CASQ2	46	AKAP6	51	BIN1	56	GJC1	61	SLC8A1
6	SCN1B	12	KCNAB1	18	KCNQ1	24	KCNJ2	30	CALR	36	ATP2A2
