# Supplementary material for: Wenxin Keli for the Treatment of Arrhythmia—Systems Pharmacology and In Vivo Pharmacological Assessment
Source: Front Pharmacol. 2021 Aug 26;12:704622. doi: 10.3389/fphar.2021.704622 (PMC8426352; doi:10.3389/fphar.2021.704622)
Supplement: Supplementary file 3 [file Table3.XLSX]

## Sheet: Sheet1
Appendix 3. 75 KEGG pathways associated with 33 anti-arrhythmic targets of WK
Term	Count	Pop Hits	PValue	Notes
hsa05200:Pathways in cancer	16	393	1.22e-11	*
hsa05161:Hepatitis B	11	145	2.66e-10	*
hsa05014:Amyotrophic lateral sclerosis (ALS)	7	50	5.63e-08	*
hsa05166:HTLV-I infection	11	254	6.18e-08
hsa05215:Prostate cancer	8	88	7.06e-08	*
hsa04210:Apoptosis	7	62	2.1e-07	*
hsa05133:Pertussis	7	75	6.62e-07	#
hsa04010:MAPK signaling pathway	10	253	7.76e-07	*
hsa05222:Small cell lung cancer	7	85	1.39e-06
hsa05210:Colorectal cancer	6	62	6.05e-06	*
hsa04071:Sphingolipid signaling pathway	7	120	1.05e-05	*
hsa05140:Leishmaniasis	6	71	1.18e-05	#
hsa05220:Chronic myeloid leukemia	6	72	1.27e-05	*
hsa05205:Proteoglycans in cancer	8	200	1.82e-05	*
hsa05203:Viral carcinogenesis	8	205	2.14e-05	*
hsa05030:Cocaine addiction	5	49	5.43e-05
hsa04915:Estrogen signaling pathway	6	99	5.98e-05	#
hsa05142:Chagas disease (American trypanosomiasis)	6	104	7.57e-05	#
hsa04151:PI3K-Akt signaling pathway	9	345	8.17e-05	*
hsa05146:Amoebiasis	6	106	8.29e-05
hsa04668:TNF signaling pathway	6	107	8.67e-05	*
hsa05145:Toxoplasmosis	6	110	9.89e-05	*
hsa05168:Herpes simplex infection	7	183	0.000114	*
hsa05230:Central carbon metabolism in cancer	5	64	0.000156	*
hsa05169:Epstein-Barr virus infection	6	122	0.000161	*
hsa05212:Pancreatic cancer	5	65	0.000165	*
hsa04115:p53 signaling pathway	5	67	0.000186
hsa05120:Epithelial cell signaling in Helicobacter pylori infection	5	67	0.000186	*
hsa05160:Hepatitis C	6	133	0.000242	*
hsa05132:Salmonella infection	5	83	0.000425	*
hsa04932:Non-alcoholic fatty liver disease (NAFLD)	6	151	0.000436	*
hsa04970:Salivary secretion	5	86	0.000487	#
hsa05202:Transcriptional misregulation in cancer	6	167	0.000692
hsa05219:Bladder cancer	4	41	0.000714	*
hsa04066:HIF-1 signaling pathway	5	96	0.000739	*
hsa04660:T cell receptor signaling pathway	5	100	0.000862	#
hsa05152:Tuberculosis	6	177	0.000901	#
hsa04020:Calcium signaling pathway	6	179	0.000948	#
hsa04620:Toll-like receptor signaling pathway	5	106	0.0010723	*
hsa05206:MicroRNAs in cancer	7	286	0.0012506
hsa05213:Endometrial cancer	4	52	0.00143234	*
hsa04024:cAMP signaling pathway	6	198	0.00148884	#
hsa05134:Legionellosis	4	54	0.00159818
hsa04722:Neurotrophin signaling pathway	5	120	0.0016996	#
hsa04621:NOD-like receptor signaling pathway	4	56	0.0017756
hsa04380:Osteoclast differentiation	5	131	0.00234485	#
hsa05321:Inflammatory bowel disease (IBD)	4	64	0.00260685
hsa05214:Glioma	4	65	0.00272499	#
hsa05031:Amphetamine addiction	4	66	0.00284638	#
hsa04662:B cell receptor signaling pathway	4	69	0.00323049	#
hsa04917:Prolactin signaling pathway	4	71	0.00350343	*
hsa05218:Melanoma	4	71	0.00350343	*
hsa04921:Oxytocin signaling pathway	5	150	0.00382828	#
hsa04012:ErbB signaling pathway	4	87	0.00619967	#
hsa04064:NF-kappa B signaling pathway	4	87	0.00619967	#
hsa04080:Neuroactive ligand-receptor interaction	6	277	0.00635992
hsa05164:Influenza A	5	174	0.00648284
hsa05020:Prion diseases	3	34	0.00945928
hsa04931:Insulin resistance	4	108	0.0112299	*
hsa04919:Thyroid hormone signaling pathway	4	115	0.0133066	#
hsa04014:Ras signaling pathway	5	226	0.0158971	#
hsa04261:Adrenergic signaling in cardiomyocytes	4	138	0.0215977	#
hsa04310:Wnt signaling pathway	4	138	0.0215977	*
hsa05221:Acute myeloid leukemia	3	56	0.0244743	*
hsa04022:cGMP-PKG signaling pathway	4	158	0.0306684	#
hsa04622:RIG-I-like receptor signaling pathway	3	70	0.0369677
hsa04920:Adipocytokine signaling pathway	3	70	0.0369677
hsa05016:Huntington's disease	4	192	0.0500374
hsa05414:Dilated cardiomyopathy	3	84	0.0514052	#
hsa05323:Rheumatoid arthritis	3	88	0.0558504
hsa04540:Gap junction	3	88	0.0558504	#
hsa04912:GnRH signaling pathway	3	91	0.0592711	#
hsa04713:Circadian entrainment	3	95	0.0639432	*
hsa05231:Choline metabolism in cancer	3	101	0.0711785	*
hsa00220:Arginine biosynthesis	2	20	0.0838122
*Pathways containing calcium signaling pathway; #Pathways closely related to calcium signaling pathway.
