# Supplementary material for: Wenxin Keli for the Treatment of Arrhythmia—Systems Pharmacology and In Vivo Pharmacological Assessment
Source: Front Pharmacol. 2021 Aug 26;12:704622. doi: 10.3389/fphar.2021.704622 (PMC8426352; doi:10.3389/fphar.2021.704622)
Supplement: Supplementary file 7 [file Table4.XLSX]

## Sheet: Sheet1
Appendix 4. Cytoplasmic Ca2+ transient in cardiomyocytes
TIME(s)				F/F0
		Blank group					Experimental group
	B1	B2	B3	B4	B5	E1	E2	E3	E4	E5
3	1.1301	0.8347	1.0087	0.8044	1.0332	0.9394	0.9961	0.9429	1.0056	0.9692
6	0.8462	0.7855	0.7956	0.7185	0.8222	1.3414	0.9972	0.9345	1.0047	0.9663
9	0.97	1.1579	0.89	0.7542	0.9058	0.9165	1.0011	0.9299	0.994	0.9635
12	0.8719	1.2649	0.8571	1.4594	0.848	0.8952	1.0186	1.1837	1.0104	1.0952
15	1.1817	0.9569	1.4486	1.2636	1.3908	0.9074	0.987	1.009	0.9853	1.0057
18	1.0175	0.8017	0.8777	0.7447	0.9378	0.878	0.9985	0.9351	0.9977	0.9647
21	1.2943	0.8083	1.1259	0.8176	1.2147	1.3936	0.9716	1.0583	0.9987	1.0221
24	1.0599	0.7851	0.9212	0.7409	0.9532	0.883	0.9698	1.0655	0.9844	1.0302
27	0.7918	0.9876	0.7195	0.6849	0.7782	1.699	0.965	0.9455	0.9905	0.9611
30	0.9556	1.032	0.8363	0.7036	0.8847	0.8775	0.9651	0.9181	0.9855	0.9536
33	0.7614	1.0284	0.6841	0.6392	0.7452	0.833	0.9763	0.8918	0.9573	0.9241
36	1.1224	0.9038	1.3445	1.1918	1.3541	0.8855	0.9434	0.8958	0.9592	0.9305
39	0.8642	1.0078	0.7653	0.6756	0.8151	0.8078	0.9464	0.9126	0.9499	0.9314
42	1.088	0.9017	1.3039	1.1528	1.292	0.7592	0.9321	0.8794	0.9239	0.9025
45	1.2912	0.7685	1.1235	0.7885	1.2521	0.751	0.9962	1.2807	0.9169	1.3475
48	1.1392	0.8653	1.252	1.0888	1.322	1.0355	0.9043	0.8545	0.8905	0.8913
51	0.9658	0.9098	1.23	1.2005	1.2099	0.7197	0.8997	0.9046	0.8863	0.9201
54	1.3337	0.7753	1.1812	0.8243	1.3245	0.6917	0.8969	0.8297	0.8838	0.8665
57	1.3214	0.7697	1.1555	0.8045	1.2919	1.1209	0.8726	0.8167	0.8609	0.8486
60	0.742	1.0667	0.8468	1.3578	0.7439	0.6678	0.8751	0.8711	0.8447	0.8793
63	1.1726	0.8272	1.275	1.0314	1.322	0.6596	1.0227	1.1783	0.8229	1.167
66	0.8658	1.1969	0.7622	0.6654	0.7958	0.7038	0.8031	0.7657	0.7929	0.8014
69	0.7883	0.9678	1.0983	1.2888	0.944	0.6026	0.7943	0.7636	0.7723	0.7978
72	1.2799	0.7597	1.0923	0.7839	1.2387	0.8871	0.7549	0.714	0.7517	0.7535
75	1.2418	0.756	1.0585	0.7495	1.184	0.5559	0.7607	0.6951	0.7314	0.7439
78	0.9096	0.8993	0.7797	0.6783	0.8489	0.7245	1.1703	0.6625	0.7265	0.877
81	0.8021	1.276	0.7158	1.0614	0.774	0.6794	0.6839	0.6323	0.6686	0.6764
84	1.3214	0.8082	1.2106	0.847	1.3143	0.5062	0.6801	0.6326	0.6603	0.6694
87	0.9061	0.986	0.8008	0.6754	0.8357	0.4675	0.6458	0.5875	0.6038	0.6206
90	0.8433	1.0013	1.2011	1.3411	1.0391	0.4502	0.6351	0.6528	0.5798	0.6574
93	0.787	0.7132	0.7272	0.6465	0.7586	0.447	0.5796	0.5201	0.5478	0.5665
96	0.8619	1.3341	0.7685	0.8522	0.8076	0.6007	0.5484	0.4956	0.5228	0.5367
99	1.1488	0.9006	1.3874	1.1648	1.3341	0.4045	0.5307	0.7574	0.5104	0.7428
102	1.2704	0.809	1.1117	0.8113	1.2058	0.5877	0.5302	0.5263	0.4848	0.536
105	0.8657	1.3767	0.8036	0.9719	0.8305	0.3776	0.5214	0.7238	0.4795	0.7256
108	1.3899	0.8644	1.3548	0.9585	1.4258	0.7164	0.4924	0.4494	0.4671	0.4811
111	0.9458	1.3171	0.8514	0.747	0.8744	0.741	0.4786	0.4266	0.4496	0.6371
114	1.186	0.9541	1.4267	1.2557	1.3805	0.3472	0.4562	0.4007	0.4328	0.43
117	0.9529	1.2956	0.8753	0.7478	0.898	0.372	0.4591	0.408	0.4277	0.442
120	0.8893	1.2589	0.9097	1.4798	0.8423	0.3339	0.4488	0.3966	0.4157	0.4265
123	0.8671	1.1536	1.1294	1.5286	0.8812	0.3336	0.4409	0.3908	0.4194	0.4298
126	1.0637	1.0087	1.4376	1.3636	1.2991	0.6059	0.4433	0.5904	0.4122	0.5457
129	0.8747	1.2245	1.0193	1.5417	0.86	0.3173	0.4225	0.3762	0.3945	0.4054
132	1.2444	0.8478	1.0957	0.8329	1.12	0.6482	0.417	0.3608	0.3952	0.394
135	0.9577	1.4009	0.8786	1.2462	0.8989	0.3038	0.3905	0.37	0.3719	0.3859
138	0.968	0.8146	0.9047	0.7412	0.8871	0.2991	0.3809	0.349	0.369	0.3627
141	0.9766	1.0741	1.4268	1.4515	1.2245	0.5947	0.3773	0.348	0.3522	0.3513
144	1.1252	0.8518	1.0269	0.8085	1.0054	0.2803	0.3752	0.3478	0.3542	0.3504
147	0.897	1.4527	0.8861	0.8508	0.8495	0.263	0.3614	0.4462	0.337	0.4656
150	1.4394	0.9588	1.5886	1.1315	1.5343	0.413	0.3516	0.3302	0.3276	0.3265
153	0.8797	0.8572	0.8984	0.7856	0.8367	0.3665	0.3452	0.3464	0.3182	0.3429
156	1.2622	0.8994	1.2087	0.8851	1.155	0.3063	0.3298	0.2994	0.3174	0.3071
159	0.929	1.4993	0.97	1.3948	0.9154	0.5306	0.3213	0.2933	0.3078	0.2979
162	0.9218	1.2535	1.3553	1.6545	0.9893	0.2432	0.2986	0.2721	0.2959	0.2866
165	1.3623	0.9405	1.3536	0.9601	1.272	0.2707	0.2971	0.2689	0.2878	0.2849
168	0.942	1.4694	0.9893	0.8437	0.9153	0.4443	0.3015	0.2541	0.2768	0.2718
171	0.9518	1.4159	0.9887	0.836	0.9026	0.4458	0.2794	0.2577	0.2719	0.2666
174	0.9449	1.3342	1.287	1.7153	0.9351	0.2214	0.2765	0.2641	0.2674	0.268
177	1.4926	0.9783	1.6143	1.0641	1.498	0.2342	0.2588	0.2474	0.2563	0.2533
180	1.4548	1.021	1.7664	1.2389	1.6022	0.4221	0.2719	0.2817	0.2476	0.2714
183	1.3352	0.9546	1.3575	0.971	1.2651	0.4239	0.2385	0.3343	0.2444	0.3628
186	0.977	1.5823	1.063	1.0066	0.9409	0.2179	0.2392	0.2478	0.2361	0.2411
189	1.3409	1.0848	1.8591	1.4459	1.582	0.2032	0.2319	0.221	0.2353	0.3339
192	1.1542	0.9292	1.2601	0.9376	1.1142	0.2112	0.2372	0.2138	0.2338	0.282
195	1.0143	1.2041	1.142	0.8978	0.9957	0.1965	0.2337	0.2111	0.2288	0.2222
198	0.9276	1.4934	1.0916	1.6164	0.9198	0.2139	0.235	0.2126	0.236	0.2318
201	0.9142	1.3867	1.2269	1.7358	0.9124	0.189	0.2356	0.2196	0.2225	0.3074
204	1.4658	0.9871	1.6736	1.103	1.4999	0.3713	0.2252	0.22	0.221	0.2218
207	1.0166	0.9197	1.1678	0.8962	0.9971	0.1875	0.2287	0.2023	0.2188	0.2585
210	0.9101	1.2534	1.5952	1.7619	1.0844	0.2033	0.2232	0.2344	0.2163	0.3084
213	1.4426	1.0226	1.8689	1.2883	1.62	0.2153	0.2169	0.1983	0.2128	0.2035
216	1.0191	0.8956	1.1811	0.9131	1.0099	0.1797	0.2202	0.1927	0.2155	0.2031
219	0.9951	1.2326	1.1607	0.9074	0.9868	0.1836	0.2122	0.1876	0.2034	0.1958
222	0.9228	0.8928	1.0839	0.8874	0.9233	0.3681	0.2058	0.1892	0.2056	0.1976
225	1.4177	0.9855	1.8428	1.2658	1.5902	0.3407	0.204	0.1869	0.2067	0.1929
228	1.3241	0.9235	1.4852	1.0114	1.3107	0.2603	0.2045	0.1821	0.2032	0.1952
231	0.8545	0.854	1.0644	0.8474	0.8973	0.3491	0.2029	0.266	0.2036	0.2337
234	0.8523	1.4321	1.0644	1.4751	0.887	0.1742	0.2073	0.1869	0.2056	0.2325
237	0.8234	1.4677	1.0276	1.0076	0.8679	0.1963	0.2078	0.268	0.2006	0.307
240	1.1545	1.0381	1.8015	1.5141	1.4547	0.214	0.2096	0.2844	0.2079	0.2965
243	1.0593	0.8505	1.2264	0.9098	1.0547	0.1772	0.3333	0.28	0.2124	0.3546
246	0.86	1.4351	1.0672	0.9586	0.8957	0.1879	0.2102	0.1905	0.2135	0.2031
249	0.8537	1.4574	1.0647	1.2112	0.8795	0.2174	0.2177	0.1955	0.2174	0.2077
252	0.7755	1.3952	0.9607	0.9811	0.8166	0.2378	0.2223	0.2413	0.221	0.2348
255	1.0388	0.8345	1.1909	0.877	1.0464	0.344	0.2286	0.3058	0.227	0.3305
258	0.7672	0.85	0.9768	0.815	0.8027	0.3977	0.2334	0.2111	0.2349	0.2257
261	0.8395	0.7778	1.0488	0.8185	0.8722	0.397	0.2483	0.2182	0.2372	0.2321
264	0.8227	1.2014	1.0062	0.822	0.8648	0.2054	0.2449	0.2532	0.2442	0.2541
267	0.7659	1.3268	0.9853	1.1487	0.8386	0.2463	0.2529	0.229	0.2509	0.3048
270	1.2618	0.8355	1.6216	1.0772	1.478	0.2077	0.263	0.3217	0.2532	0.3902
273	0.709	0.865	0.8726	0.7535	0.7694	0.2253	0.2714	0.2434	0.2689	0.2584
276	0.7306	1.1407	1.0291	1.4428	0.791	0.3378	0.2667	0.2533	0.2731	0.2699
279	0.8522	0.7409	1.0361	0.763	0.9049	0.2249	0.2868	0.2578	0.2828	0.3351
282	0.7316	1.2255	0.8853	1.0899	0.792	0.4687	0.293	0.2594	0.2816	0.2799
285	1.0027	0.8126	1.5518	1.2161	1.3408	0.2404	0.3009	0.2728	0.3002	0.2961
288	0.6752	1.002	1.2257	1.4824	0.8477	0.3976	0.3132	0.2836	0.3059	0.3013
291	1.0899	0.7254	1.3028	0.8649	1.2161	0.253	0.3197	0.2809	0.3123	0.3093
294	0.809	0.71	0.9776	0.7485	0.851	0.2679	0.3255	0.2974	0.319	0.3147
297	0.663	1.0097	1.051	1.41	0.7668	0.2691	0.3336	0.3043	0.3286	0.3268
300	0.7686	0.673	0.9721	0.7389	0.8324	0.3212	0.346	0.3178	0.3388	0.3368
303	0.8364	0.6637	1.002	0.7303	0.8715	0.2743	0.353	0.3139	0.3425	0.4142
