# Supplementary material for: Wenxin Keli for the Treatment of Arrhythmia—Systems Pharmacology and In Vivo Pharmacological Assessment
Source: Front Pharmacol. 2021 Aug 26;12:704622. doi: 10.3389/fphar.2021.704622 (PMC8426352; doi:10.3389/fphar.2021.704622)
Supplement: Supplementary file 8 [file Table1.XLSX]

## Sheet: Sheet1
Appendix 1. 192 WK targets. (gene name)
No.	Target	No.	Target	No.	Target	No.	Target	No.	Target	No.	Target	No.	Target	No.	Target	No.	Target	No.	Target	No.	Target
1	PTGS1	19	BCHE	37	PRSS3	55	PTPN1	73	RELA	91	FTMT	108	OPRD1	125	CHRM4	142	DPP4	159	CCNA2	176	KCNH2
2	AMY1A	20	CTSD	38	TPI1	56	CDC25B	74	TPO	92	FASN	109	PDE3A	126	CCND1	143	CYP3A4	160	F10	177	ESR2
3	AMY1B	21	GLB1	39	TXNRD1	57	SLC25A10	75	TERF1	93	EDN1	110	ADRB1	127	TOP2B	144	CYP1A2	161	F7	178	SELE
4	AMY1C	22	MAN2A1	40	ALDH5A1	58	MDH2	76	SOD1	94	CTRB1	111	AR	128	BCL2L1	145	CYP1A1	162	CDK2	179	SLC2A4
5	ACP3	23	ADH1C	41	SDHA	59	GLRA1	77	PON1	95	CAT	112	ADRA2C	129	BIRC5	146	CDKN1A	163	CALM1	180	PSMG1
6	PTGS2	24	F2	42	AGXT	60	GLUD1	78	PTGIS	96	GUSB	113	ADRA2A	130	ADRA1D	147	TP53	164	CALM2	181	ADCYAP1
7	AMY2A	25	SLC6A4	43	MAT2A	61	GFOD1	79	LRP1	97	ALOX5	114	ADRA1B	131	JUN	148	CALCR	165	CALM3	182	IL1B
8	NOS1	26	RXRA	44	MAT1A	62	CASP3	80	PLG	98	APOA1	115	ADRA1A	132	FOS	149	BCL2	166	BACE1	183	IFNG
9	NEU1	27	CHRM1	45	PKM	63	GOT2	81	NFKB1	99	MAOB	116	NCOA2	133	PARP4	150	AHSA1	167	BACE2	184	MAP2K4
10	MAN1A2	28	PRKACA	46	SRC	64	GOT1	82	NCF1	100	AKR1C1	117	CHRM2	134	NPM1	151	ACHE	168	NOS3	185	CASP1
11	MAN1C1	29	ESR1	47	P4HA2	65	AKR1B1	83	AOC3	101	PFKM	118	GABRA6	135	NR1I2	152	KDR	169	LTA4H	186	BAX
12	MAN1A1	30	DRD1	48	P3H3	66	ADH1B	84	LYZ	102	SLC6A2	119	GABRA2	136	NFKBIA	153	CHEK1	170	PKIA	187	TRPV1
13	LCT	31	CA2	49	P3H1	67	ADH1A	85	IL4	103	SLC6A3	120	TNF	137	MYC	154	PIM1	171	ISYNA1	188	EGFR
14	IGHG1	32	ADRB2	50	OTC	68	ADSSL1	86	IFNB1	104	SCN5A	121	STAT3	138	MMP9	155	PPARG	172	NQO2	189	SLC22A5
15	PYGM	33	PIK3CG	51	OAT	69	ACAT2	87	HEY1	105	CHRNA7	122	PGR	139	ITGB3	156	NOS2	173	GABRA3	190	RHO
16	GRIA2	34	HSP90AB1	52	ME3	70	ABAT	88	GLIPR2	106	CHRM5	123	NCOA1	140	ECE1	157	MAPK14	174	ADRA2B	191	GUSBP1
17	GABRA1	35	HSP90AA1	53	ME2	71	TAT	89	GSTP1	107	CHRM3	124	OPRM1	141	EDNRA	158	GSK3B	175	HTR2A	192	PTEN
18	IL10	36	COL1A1	54	PCYT1A	72	NR3C1	90	MMP2
